# Supplementary material for: Litchi pulp-derived gamma-aminobutyric acid (GABA) extract counteracts liver inflammation induced by litchi thaumatin-like protein
Source: Royal Society of Chemistry journal article supplement (doi:10.1039/d3fo05463b), 2024-01-01
Supplement: d3fo05463b1.pdf [file d3fo05463b1.pdf]

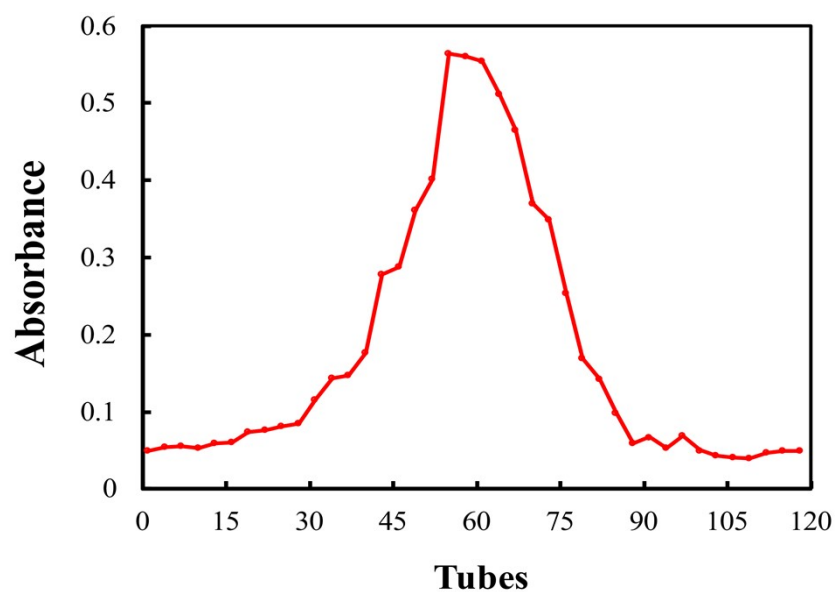

**Fig. S1.** The elution curve of LGE on Sephadex-G10. LGE was eluted with distilled water, the elution peak was collected and lyophilized.

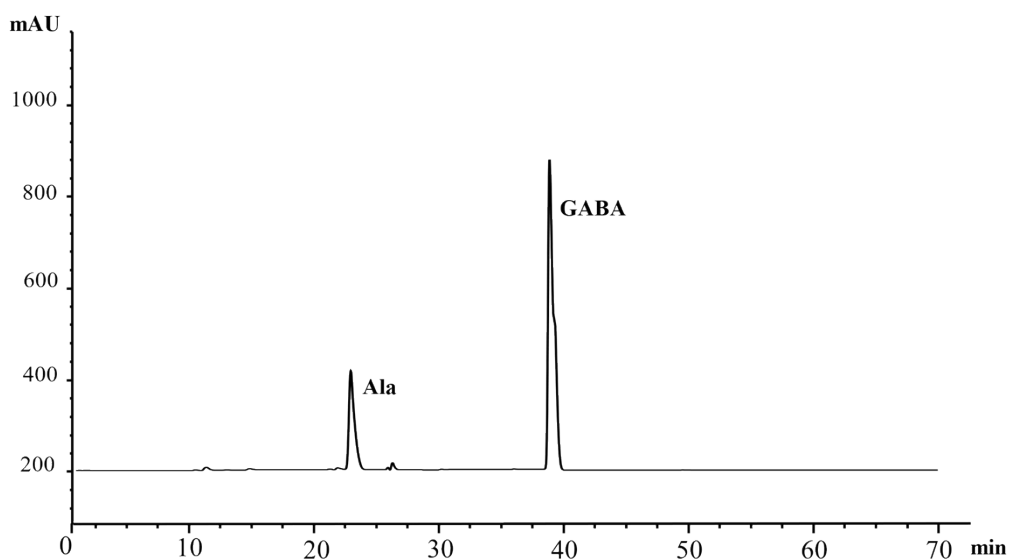

**Fig. S2.** The HPLC chromatogram of LGE. The amino acids detected in LGE were Alanine and GABA.

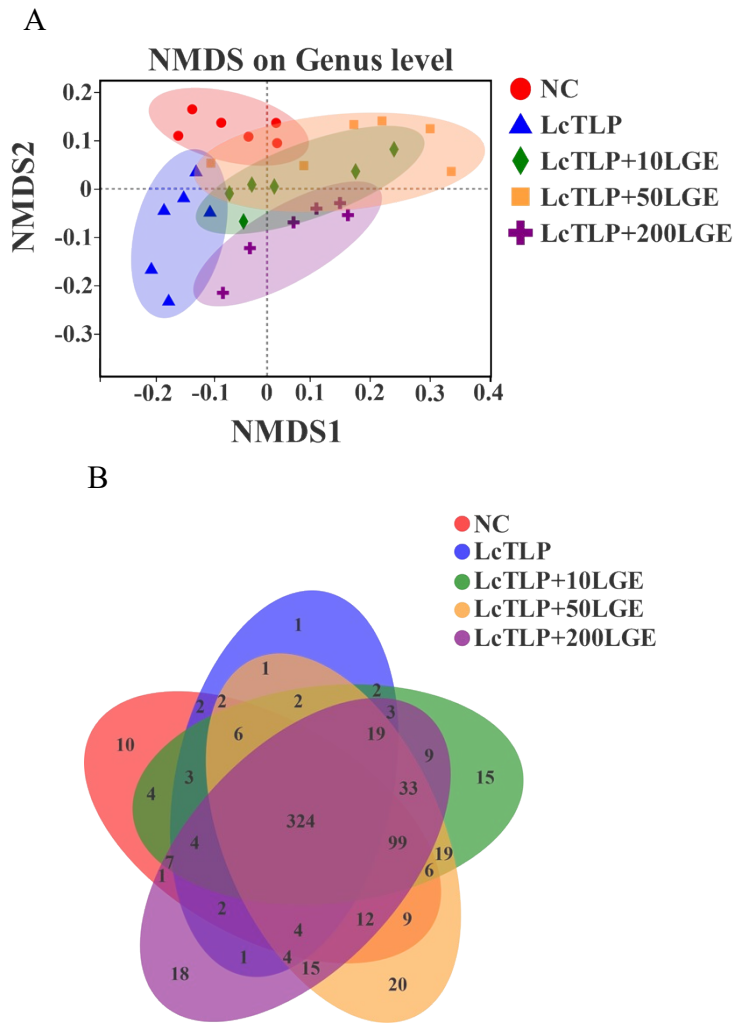

**Fig. S3.** Gut microbiota analysis. (A) NMDS of the weighted UniFrac distances (B) Venn diagram of five groups on OTUs level.

**Table S1.** The contents of the main amino acids in LGE

| Amino acids | Content (% DW) |
|-------------|----------------|
| Alanine     | 23.4           |
| GABA        | 70.6           |
