# Supplementary material for: Litchi pulp-derived gamma-aminobutyric acid (GABA) extract counteracts liver inflammation induced by litchi thaumatin-like protein
Source: Royal Society of Chemistry journal article supplement (doi:10.1039/d3fo05463b), 2024-01-01
Supplement: d3fo05463b2.pdf [file d3fo05463b2.pdf]

### Electronic Supplementary information

Raw images of Western blot and electrophoresis data

(A)

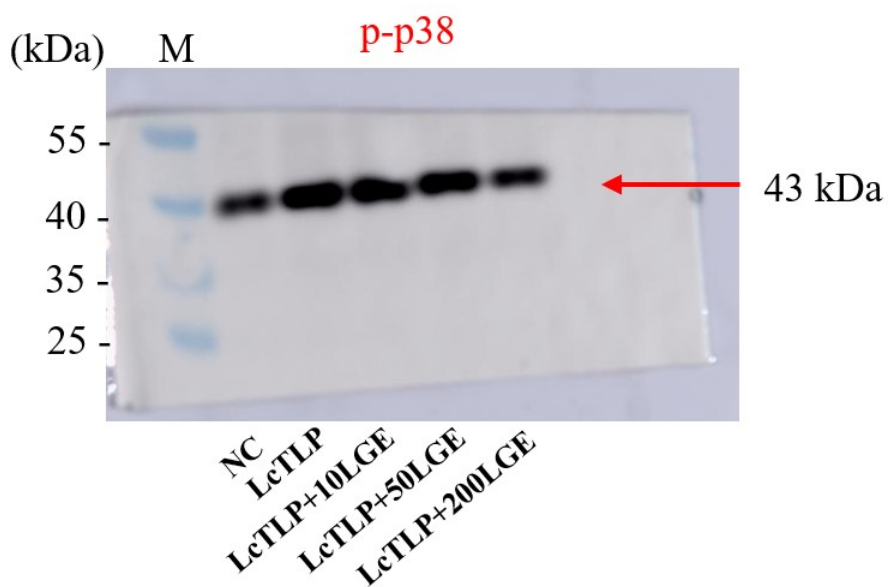

(B)

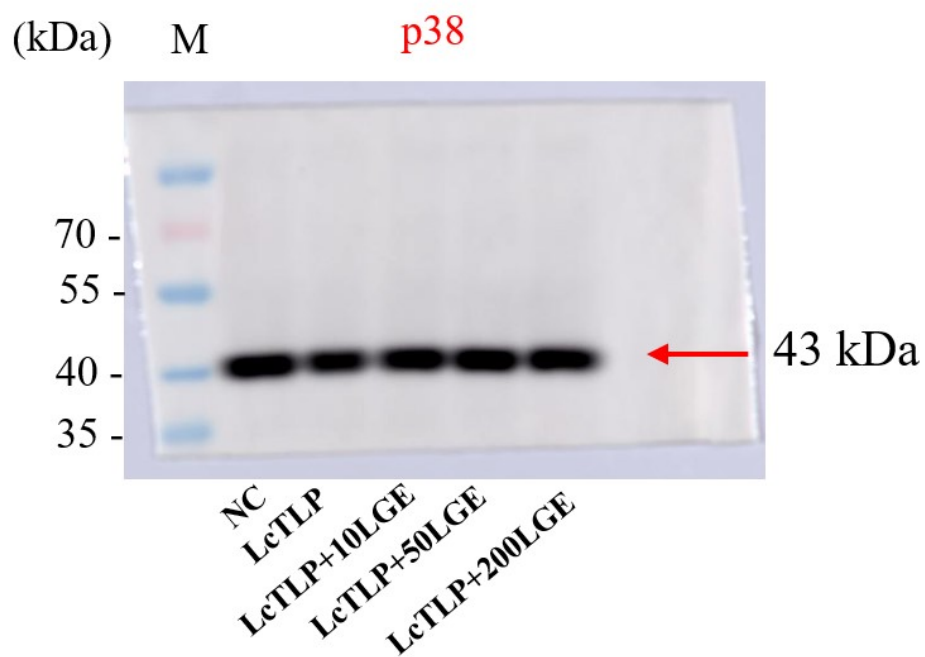

Fig. E1. Raw images of Western blot. (A): p-p38; (B): p38.

(C)

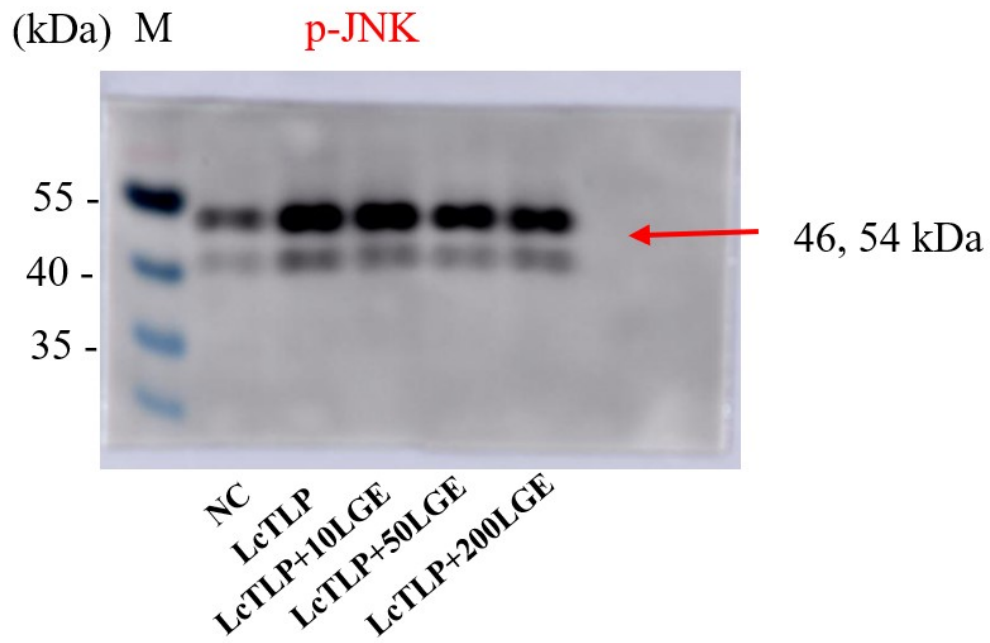

(D)

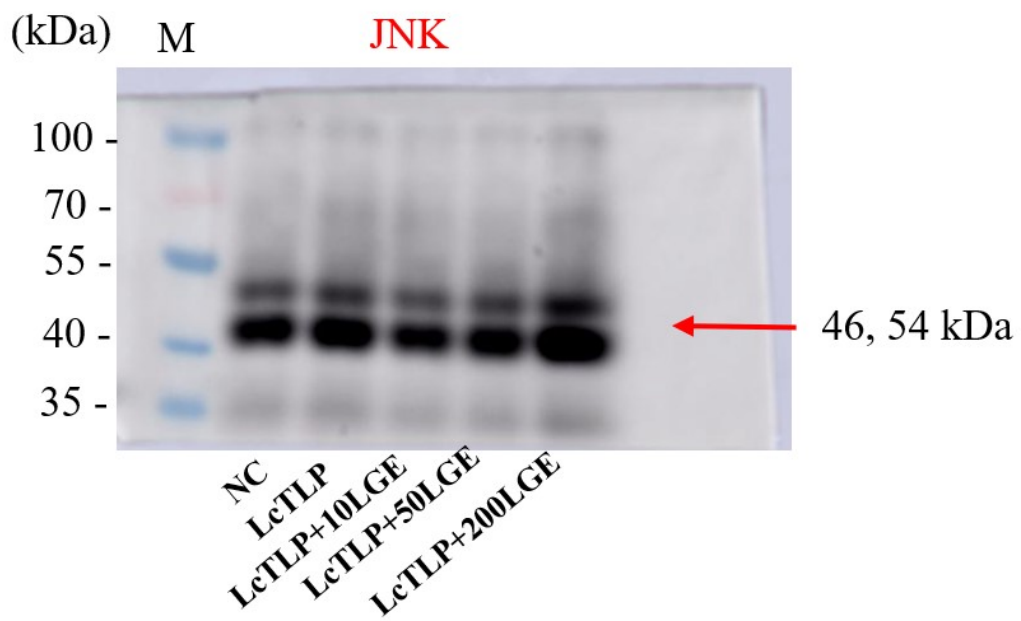

Fig. E2. Raw images of Western blot. (C): p-JNK; (D): JNK.

(E)

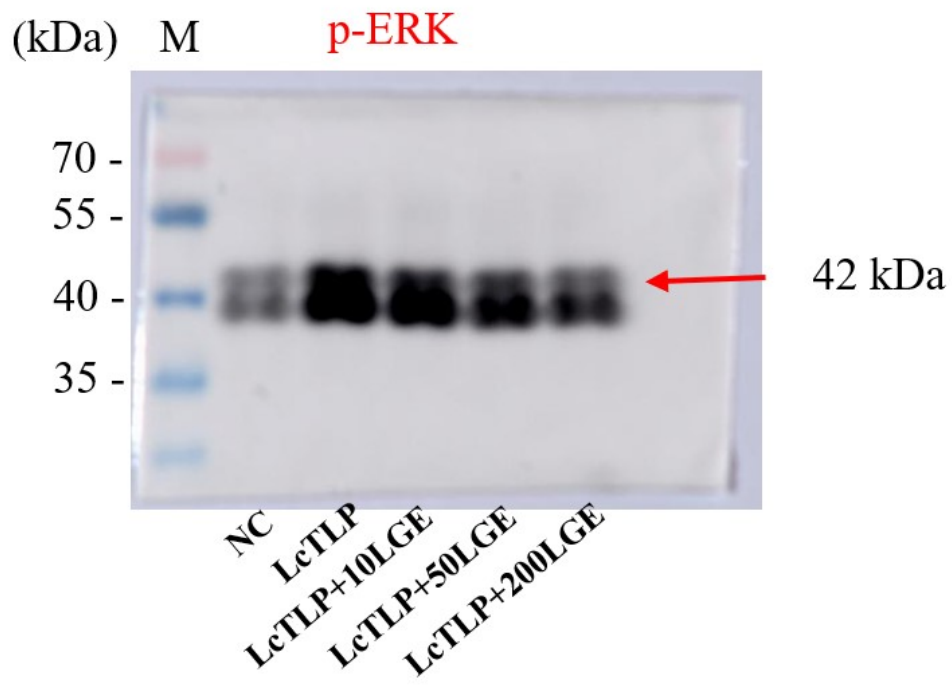

(F)

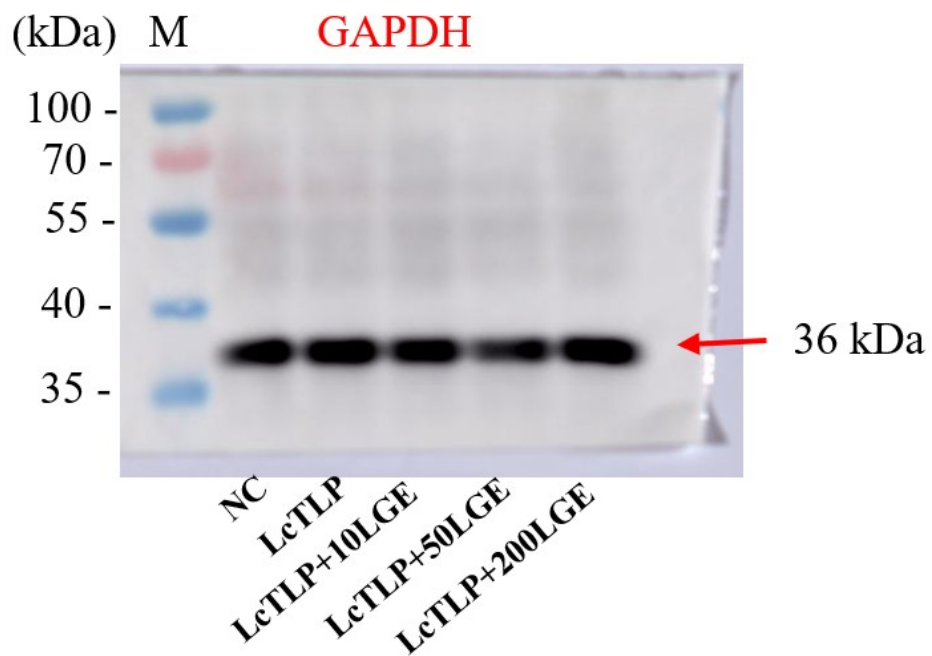

Fig. E3. Raw images of Western blot. (E): p-ERK; (F): GAPDH

**Table E1.** The gray value ratio of western blot in each group as calculated with Image J

| Group        | p-p38  |        |        | p38    |        |        | p-p38/p38   |           |           | Mean      | S.D.      |
|--------------|--------|--------|--------|--------|--------|--------|-------------|-----------|-----------|-----------|-----------|
| NC           | 225201 | 161477 | 191894 | 323998 | 323998 | 323998 | 0.5922691   | 0.4983889 | 0.6950691 | 0.5952424 | 0.0983738 |
| LcTLP        | 326840 | 284087 | 377741 | 258379 | 258379 | 258379 | 1.2649635   | 1.0994973 | 1.4619648 | 1.2754752 | 0.1814623 |
| LcTLP+10LGE  | 307731 | 228057 | 267963 | 256219 | 256219 | 256219 | 1.0458358   | 0.8900862 | 1.2010468 | 1.0456563 | 0.1554804 |
| LcTLP+50LGE  | 250656 | 235741 | 348062 | 246084 | 246084 | 246084 | 1.018579    | 0.9579696 | 1.4144032 | 1.1303173 | 0.247885  |
| LcTLP+200LGE | 193201 | 151747 | 228619 | 280243 | 280243 | 280243 | 0.6894053   | 0.5414836 | 0.8157884 | 0.6822258 | 0.1372933 |
|              | p-JNK  |        |        | JNK    |        |        | p-JNK/JNK   |           |           | Mean      | S.D.      |
| NC           | 128207 | 127967 | 170675 | 381683 | 381683 | 381683 | 0.3358992   | 0.3352704 | 0.4471643 | 0.3727779 | 0.0644212 |
| LcTLP        | 284881 | 391226 | 315805 | 414003 | 410003 | 410003 | 0.6881134   | 0.7702505 | 0.9542028 | 0.8041889 | 0.1362525 |
| LcTLP+10LGE  | 256358 | 230276 | 366920 | 316935 | 316935 | 316935 | 0.8088662   | 0.7265717 | 1.1577137 | 0.8977172 | 0.2288924 |
| LcTLP+50LGE  | 230328 | 263241 | 338013 | 342659 | 342659 | 342659 | 0.6721785   | 0.7682302 | 0.9864413 | 0.80895   | 0.1610399 |
| LcTLP+200LGE | 260892 | 244803 | 357385 | 540556 | 540556 | 540556 | 0.4826364   | 0.4528726 | 0.6611433 | 0.5322174 | 0.1126405 |
|              | p-ERK  |        |        | GAPDH  |        |        | p-ERK/GAPDH |           |           | Mean      | S.D.      |
| NC           | 234016 | 204762 | 266894 | 246554 | 246554 | 246554 | 0.949147    | 0.8304956 | 1.0824971 | 0.9540466 | 0.1260722 |
| LcTLP        | 540555 | 573242 | 511472 | 292549 | 292549 | 292549 | 1.8477417   | 1.9594735 | 1.7483293 | 1.8518482 | 0.1056319 |
| LcTLP+10LGE  | 531605 | 495576 | 409456 | 255902 | 255902 | 255902 | 2.0773773   | 1.9365851 | 1.60005   | 1.8713375 | 0.2452616 |
| LcTLP+50LGE  | 446729 | 401156 | 432834 | 238586 | 238586 | 238586 | 1.8724024   | 1.6813895 | 1.8141634 | 1.7893185 | 0.0979001 |
| LcTLP+200LGE | 309643 | 434661 | 401720 | 295657 | 295657 | 295657 | 1.0473048   | 1.4701529 | 1.3587366 | 1.2920648 | 0.2191666 |
